# Supplementary material
Source: Springer Nature journal article supplement (https://www.springermedizin.de/resource/supplementary/13012_2012_620_MOESM1_ESM.pdf/9630390)
Supplement: MOESM1 [file 9630390]

Copenhagen, DD.MM.YYYY

Dear Colleague,

Within the last calendar month we have not detected an external quality assessment analysis for haemoglobin or glucose from your practice point-of-care equipment.

Execution of external quality assessment analysis is important for improving the quality of point-of-care testing and is a prerequisite for receiving fees for this service.

Apply number XXXXXX-XXXX for ordering external quality assessment analysis in the WebQuality system. For questions, please contact our telephone hotline: XXXXXXXX.

If you do not perform point-of-care testing for haemoglobin or glucose, please disregard this message.

Yours sincerely,  
Niels Mosbæk,  
Director, CGPL
